# Supplementary material
Source: Springer Nature journal article supplement (https://www.springermedizin.de/resource/supplementary/13075_2013_4001_MOESM2_ESM.pdf/9695870)

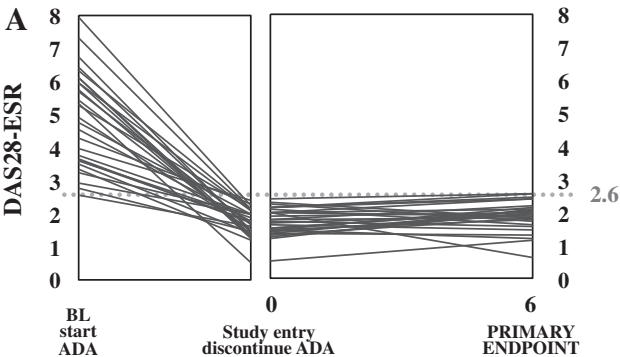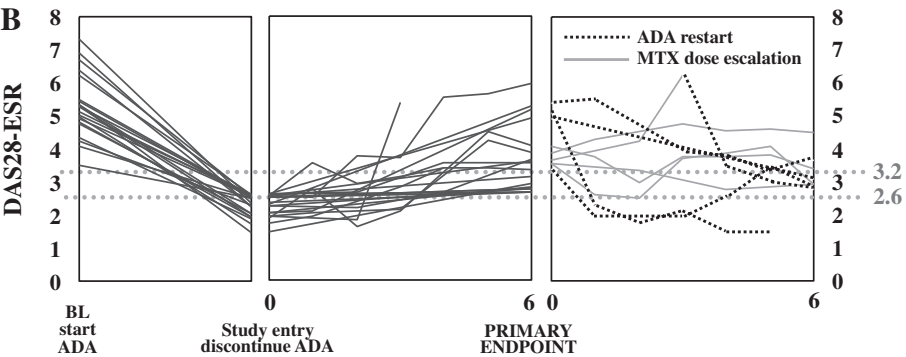

Supplement: MOESM2 [file 9695870]
